# Supplementary material for: Understanding Causes of Death in Patients With Acute Respiratory Distress Syndrome: A Narrative Review
Source: PubMed Central journal article supplement — Crit Care Explor. 2024 Aug 22;6(9):e1147. doi: 10.1097/CCE.0000000000001147 (PMC11343544; doi:10.1097/cce.0000000000001147), 2024-08-22
Supplement: cc9-6-e1147-s001.pdf [file cc9-6-e1147-s001.pdf]

## SUPPLEMENT

### **Understanding Causes of Death in Patients with Acute Respiratory Distress Syndrome: A Narrative Analysis and Review**

Susan E Bromley,<sup>1</sup> MSc, Kaweh Shakery<sup>2</sup>, MD, Pareen Vora,<sup>2</sup> PhD, Artin Atabaki<sup>2</sup>, PhD, Thomas Reimer<sup>2</sup>, MD, Fellowship in Critical Care, Lawrence McDermott,<sup>2</sup> MD, Fellowships in Pulmonary and Critical Care, Negin Hajizadeh<sup>2</sup>, MD, Fellowships in Medical Informatics, Pulmonary and Critical Care

1. EpiMed Communications, Abingdon, Oxon, UK
2. Bayer AG, Berlin, Germany

#### **Table of Contents**

|                                                                                                                                        |    |
|----------------------------------------------------------------------------------------------------------------------------------------|----|
| eFigure 1a. Identification of articles included in the review from the initial broad search.....                                       | 4  |
| eFigure 1b. Identification of articles included in the review from the search targeted to capture ARDS clinical trials. ....           | 5  |
| eTable 1. Reported cause of death in patients with non-COVID ARDS (observational studies reporting on at least 100 deaths). ....       | 6  |
| eTable 2. Reported cause of death among patients with non-COVID ARDS (observational studies reporting on 30 to <100 deaths; n=6). .... | 8  |
| eTable 3. Details on individual observational reporting on causes of death among patients with non-COVID ARDS) studies (n=10). ....    | 10 |
| eTable 4. Details on individual observational studies reporting on causes of death among patients with COVID ARDS) (n=6). ....         | 15 |

|                                                                                                                        |    |
|------------------------------------------------------------------------------------------------------------------------|----|
| eTable 5. Categories used to record death in observational studies where this was pre-specified.....                   | 17 |
| eTable 6. Reported cause of death in clinical trials of patients with ARDS (all were non-COVID-related ARDS, n=5)..... | 21 |
| eTable 7. Reported cause of death in patients with COVID-ARDS (observational studies, n=6).....                        | 23 |

## **eMethods – Search strings**

### *Primary search*

("acute respiratory distress syndrome" [title] OR "ARDS" [title]) AND ("death" [title] OR "deaths" [title] OR "mortality" [title] OR "survival" [title] OR "non-survivors" [title] OR "non-survival" [title] OR "prognosis" [title] OR "clinical course" [title] OR "management" [title] OR "intensive care" [title] OR "outcome" [title] OR "outcomes" [title]) NOT "case report" NOT "pediatrics" [title] NOT "paediatrics" [title] NOT "pediatric" [title] NOT "paediatric" [title] NOT "Review" [PT]

### *Additional search*

("acute respiratory distress syndrome" [title] OR "ARDS" [title]) AND ("trial" [title])

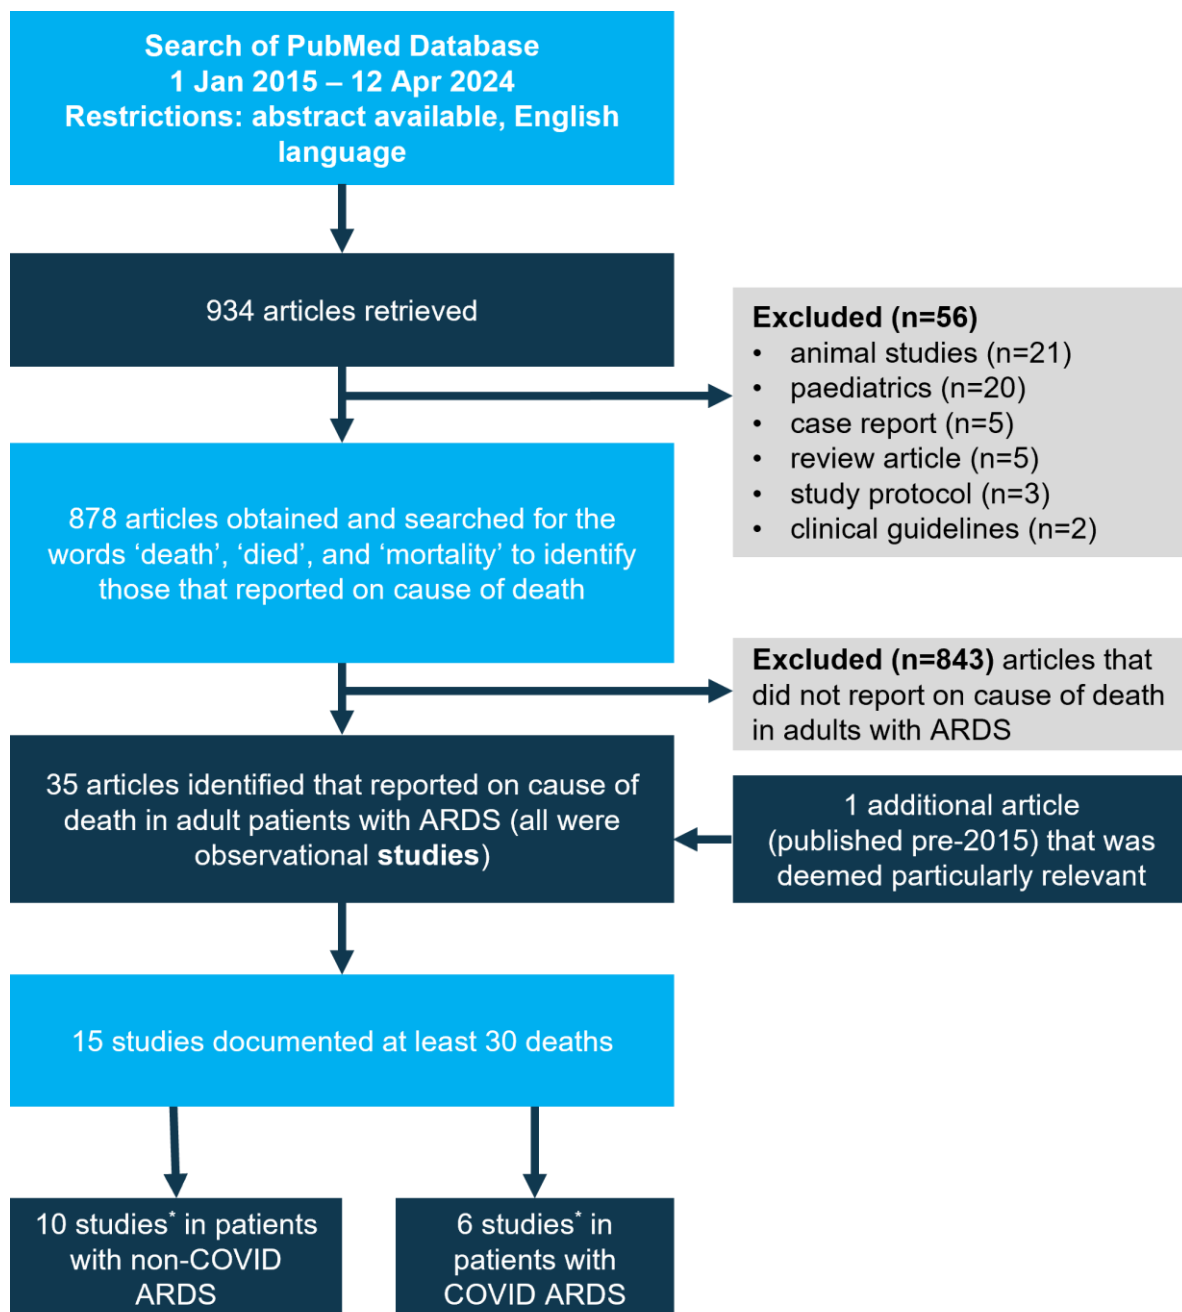

**eFigure 1a.** Identification of articles included in the review from the initial broad search.

\*One study reported on cause of death among patients with non-COVID ARDS and separately among patients with COVID ARDS

ARDS, acute respiratory distress syndrome

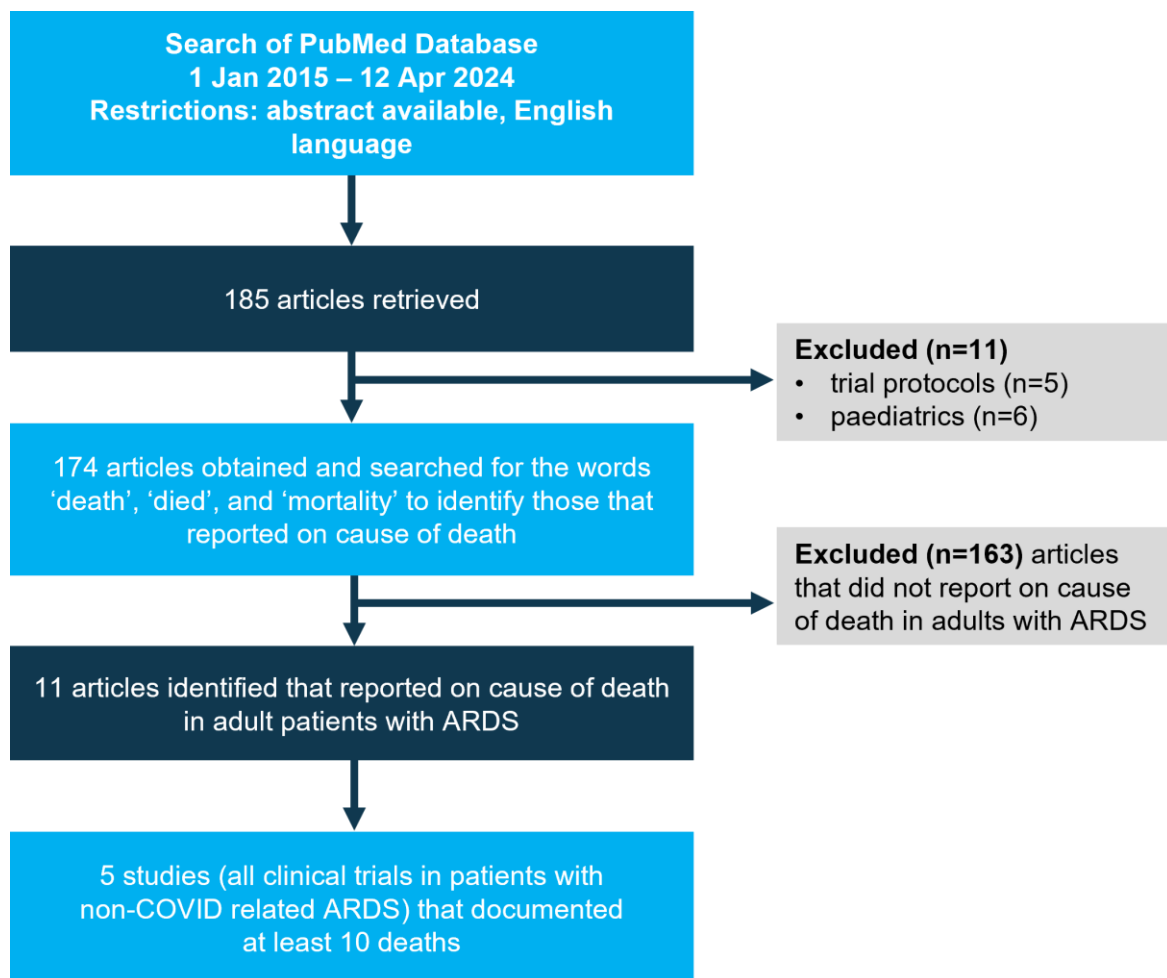

**eFigure 1b.** Identification of articles included in the review from the search targeted to capture ARDS clinical trials.

ARDS, acute respiratory distress syndrome

**eTable 1.** Reported cause of death in patients with non-COVID ARDS (observational studies reporting on at least 100 deaths).

| Reported cause of death                           |                   |                 |                          |     |                      |         |             |                                                   |                                   |                     |              |            |             |          |          |     |             |                                |
|---------------------------------------------------|-------------------|-----------------|--------------------------|-----|----------------------|---------|-------------|---------------------------------------------------|-----------------------------------|---------------------|--------------|------------|-------------|----------|----------|-----|-------------|--------------------------------|
| Author(s); year; study period                     | Deaths / patients | Data collection | Pre-specified categories | MOF | Refractory hypoxemia | Sepsis* | Brian death | Withdrawal of life support / end of life decision | Limitation of therapeutic efforts | Mesenteric ischemia | CNS disorder | Pulmonary‡ | Neurologic‡ | Cardiac‡ | Hepatic‡ | GI‡ | Hemorrhage‡ | Other§                         |
| Laffey et al. 2017, LUNG SAFE; International 2014 | 964 / 2813        | Prospective     | ✓                        | NC  | NC                   | NC      | NC          | NC                                                | NC                                | NC                  | NC           | 42%        | 11%         | 37%      | 5%       | NC  | 1%          | 3% renal failure<br>1% unknown |
| Villar et al, 2018; Spain; NR                     | 302 / 778         | Prospective     | ✓                        | 49% | 23%                  | 17%     | 5%          | NC                                                | 4%                                | NC                  | NC           | NC         | NC          | NC       | NC       | NC  | NC          | 2%                             |
| Gacouin et al; 2020; France; Oct 2009–Mar 2020    | 197 / 572         | Prospective     | ✓                        | 50% | 16%                  | NC      | NC          | 6%                                                | NC                                | 6%                  | 8%           | NC         | NC          | NC       | NC       | NC  | NC          | 15%                            |

| Reported cause of death                    |                   |                 |                          |     |                      |         |             |                                                   |                                   |                     |              |            |             |          |          |     |             |        |
|--------------------------------------------|-------------------|-----------------|--------------------------|-----|----------------------|---------|-------------|---------------------------------------------------|-----------------------------------|---------------------|--------------|------------|-------------|----------|----------|-----|-------------|--------|
| Author(s); year; study period              | Deaths / patients | Data collection | Pre-specified categories | MOF | Refractory hypoxemia | Sepsis* | Brian death | Withdrawal of life support / end of life decision | Limitation of therapeutic efforts | Mesenteric ischemia | CNS disorder | Pulmonary† | Neurologic‡ | Cardiac‡ | Hepatic‡ | GI‡ | Hemorrhage‡ | Other§ |
| Ketcham <i>et al</i> , 2020; US; 2016–2017 | 127 / NR          | Retrospective   | ✓                        | NC  | NC                   | 29%     | NC          | NC <sup>  </sup>                                  | NC                                | NC                  | NC           | 28%        | 17%         | 10%      | 6%       | 4%  | 4%          | 2%     |

\*Includes septic shock.

†In individuals aged ≥18 year.

‡Organ system that most directly contributed to death or withdrawal of life support.

§In Villar *et al*, 2% had patients had either ventricular arrhythmia (n=1), hemorrhagic shock (n=2), cardiogenic shock (n=2), or anaphylactic shock (n=1). In Gacouin *et al*, ‘other’ was not further specified.

<sup>||</sup>This was not considered as a pre-specified mutually exclusive category for cause of death; however, the authors reported that 87% of patients who died had life support withdrawn.

ARDS, acute respiratory distress syndrome; CNS, central nervous system; GI, gastrointestinal; MOF, multiple organ failure; NC, not considered (i.e. not a category in studies that had pre-specified categories); NR not reported; US, United States

**eTable 2.** Reported cause of death among patients with non-COVID ARDS (observational studies reporting on 30 to <100 deaths; n=6).

| Author(s); year; study period                        | Deaths / patients    | Data collection | Pre-specified categories | Reported cause of death |           |                 |              |                      |                                 |                     |                    |            |               |               |                       |            |             |             |                            |        |                    |        |
|------------------------------------------------------|----------------------|-----------------|--------------------------|-------------------------|-----------|-----------------|--------------|----------------------|---------------------------------|---------------------|--------------------|------------|---------------|---------------|-----------------------|------------|-------------|-------------|----------------------------|--------|--------------------|--------|
|                                                      |                      |                 |                          | MOF                     | MOF/shock | MOF with sepsis | Septic shock | Refractory hypoxemia | Refractory respiratory acidosis | Respiratory failure | Respiratory system | CNS cause  | Cardiac cause | Hepatic cause | GI cause              | Hemorrhage | Renal cause | Head injury | Withdrawal of life support | Trauma | Infectious disease | Other* |
| <b>Stapleton et al, 2005;</b> US; 1998               | 30 / 205             | Prospective     | ✓                        | NC                      | NC        | <b>30%</b>      | NC           | NC                   | NC                              | <b>13%</b>          | NC                 | <b>29%</b> | <b>8%</b>     | <b>7%</b>     | <b>3%</b>             | <b>4%</b>  | <b>5%</b>   | NC          | NC                         | NC     | NC                 | NC     |
| <b>Maamar et al, 2023;</b> France; Oct 2009–Dec 2022 | 32/ 106 <sup>†</sup> | Prospective     | ✓                        | <b>57%<sup>‡</sup></b>  | NC        | NC              | NC           | <b>17%</b>           | NC                              | NC                  | NC                 | <b>10%</b> | NC            | NC            | <b>7%<sup>§</sup></b> | NC         | NC          | NC          | <b>10%</b>                 | NC     | NC                 | NC     |
| <b>Wu et al, 2017;</b> Taiwan; 2007–2016             | 53 / 106             | Retrospective   | ✗                        | NR                      | NR        | <b>89%</b>      | NR           | NR                   | NR                              | NR                  | NR                 | NR         | NR            | NR            | NR                    | <b>6%</b>  | NR          | NR          | NR                         | NR     | NR                 | NR     |



| Author(s); year; study period                           | Deaths / patients | Data collection | Pre-specified categories | Reported cause of death |           |                 |              |                      |                                 |                     |                    |           |               |               |          |            |             |             |                            |        |                    |        |
|---------------------------------------------------------|-------------------|-----------------|--------------------------|-------------------------|-----------|-----------------|--------------|----------------------|---------------------------------|---------------------|--------------------|-----------|---------------|---------------|----------|------------|-------------|-------------|----------------------------|--------|--------------------|--------|
|                                                         |                   |                 |                          | MOF                     | MOF/shock | MOF with sepsis | Septic shock | Refractory hypoxemia | Refractory respiratory acidosis | Respiratory failure | Respiratory system | CNS cause | Cardiac cause | Hepatic cause | GI cause | Hemorrhage | Renal cause | Head injury | Withdrawal of life support | Trauma | Infectious disease | Other* |
| <b>Al-Thani et al, 2022;</b> Qatar; Jan 2014– Jan 2020  | 35 / 85           | Retrospective   | *                        | 26%                     | NR        | NR              | 14%          | NR                   | NR                              | NR                  | NR                 | NR        | NR            | NR            | NR       | NR         | NR          | 57%         | NR                         | NR     | NR                 | NR     |
| <b>Gerard et al, 2018;</b> Belgium; Jan 2007– Jan 2017  | 30 / 51           | Prospective     | *                        | NR                      | 40%       | NR              | NR           | 17%                  | 20%                             | NR                  | NR                 | NR        | NR            | NR            | NR       | NR         | NR          | NR          | 13%                        | NR     | NR                 | 10%    |
| <b>Riviello et al, 2016;</b> Rwanda; Feb 2014– Apr 2014 | 38 / 42           | Prospective     | *                        | NR                      | NR        | NR              | NR           | NR                   | NR                              | NR                  | 11%                | NR        | NR            | NR            | 16%      | NR         | NR          | NR          | NR                         | 32%    | 18%                | 10%    |

\*In Gerard *et al*, ‘other’ was not further specified. In Riviello *et al*, cause of death was recorded as cancer in 8%, pregnancy/postpartum in 5%, cardiovascular disease in 5%, and unknown in 5%. In Al-Thani *et al*, 3% had cardiac arrest recorded as cause of death. †Influenza ARDS. ‡Infection-related MOF. §Mesenteric ischaemia. CNS, central nervous system; GI, gastrointestinal; MOF, multiple organ failure; NC, not considered (i.e. not a category in studies that had pre-specified categories); NR, not reported

**eTable 3.** Details on individual observational reporting on causes of death among patients with non-COVID ARDS) studies (n=10).

| Author(s), year, country, study period                                                                                     | Patients with ARDS                                                                                                                                                                                                                                                           | Demographics                                   | Setting                                                                                                       | ARDS definition                                                                              | Causes of death                                                                                                                                                                                                                                                                                                                                                                         |
|----------------------------------------------------------------------------------------------------------------------------|------------------------------------------------------------------------------------------------------------------------------------------------------------------------------------------------------------------------------------------------------------------------------|------------------------------------------------|---------------------------------------------------------------------------------------------------------------|----------------------------------------------------------------------------------------------|-----------------------------------------------------------------------------------------------------------------------------------------------------------------------------------------------------------------------------------------------------------------------------------------------------------------------------------------------------------------------------------------|
| <b>Laffey <i>et al</i>, 2017</b><br>International (50 countries across 6 continents)<br>4 consecutive weeks in winter 2014 | 2813 patients with ARDS who received invasive/non-invasive ventilation                                                                                                                                                                                                       | Mean age 61.3 years (SD 16.8)<br>38% female    | 459 ICUs                                                                                                      | Berlin                                                                                       | <b>N=not reported (deaths)</b> <ul style="list-style-type: none"> <li>• Respiratory failure: 41.6%</li> <li>• Cardiovascular failure: 37.1%</li> <li>• Neurologic failure: 10.9%</li> <li>• Hepatic failure: 5.3%</li> <li>• Coagulation failure: 1.2%</li> <li>• Unknown: 0.9%</li> <li>• No significant geographical variations were observed</li> </ul>                              |
| <b>Villar <i>et al</i>, 2018</b><br>Spain<br>Not reported                                                                  | 778 adults with moderate-to-severe ARDS treated with MV<br>Cause of ARDS: <ul style="list-style-type: none"> <li>• Pneumonia: 39%</li> <li>• Sepsis: 31%</li> <li>• Aspiration: 11%</li> <li>• Trauma: 11%</li> <li>• Acute pancreatitis: 5%</li> <li>• Other: 4%</li> </ul> | Mean age 55 years (SD±17);<br>31% female       | Three independent, national, multi-centre observational cohorts that enrolled patients from a network of ICUs | AECC criteria on PEEP ≥5cm H <sub>2</sub> O and the Berlin criteria for moderate/severe ARDS | <b>N=302 deaths</b> <ul style="list-style-type: none"> <li>• MOF: 49%</li> <li>• Refractory hypoxaemia due to non-resolving ARDS: 23%</li> <li>• Irreversible septic shock: 17%</li> <li>• Brain death: 5%</li> <li>• Limitation of therapeutic efforts: 4%</li> <li>• Other: 2% (1 ventricular arrhythmia, 2 haemorrhagic shock, 2 cardiogenic shock, 1 anaphylactic shock)</li> </ul> |
| <b>Gacouin <i>et al</i>, 2020</b><br>France<br>Oct 2009–Mar 2020                                                           | 572 adults with ARDS<br>Cause of ARDS was influenza virus alone in 13% and non-influenza alone in 87%                                                                                                                                                                        | Whole cohort, median age 58 years (IQR, 47–68) | Single ICU                                                                                                    | AECC                                                                                         | <b>N=197 deaths</b> <ul style="list-style-type: none"> <li>• Primary infection-related MOF (50% n=98)</li> <li>• Refractory hypoxaemia (16% n=31)</li> <li>• Mesenteric ischaemia (6% n=12)</li> <li>• Central nervous system disorder (8% n=16)</li> <li>• End-of-life decision (6% n=11)</li> <li>• Other (15% n=29)</li> </ul>                                                       |

| Author(s), year, country, study period        | Patients with ARDS                                                                                                                                                                                                                                                                                                                                                                                                                                                                                                                                                                                                    | Demographics                                         | Setting                                                                                                                                                                                                            | ARDS definition                                                                                                                                                                                                                                                       | Causes of death                                                                                                                                                                                                                                                                                                                                                                                                                                                                             |
|-----------------------------------------------|-----------------------------------------------------------------------------------------------------------------------------------------------------------------------------------------------------------------------------------------------------------------------------------------------------------------------------------------------------------------------------------------------------------------------------------------------------------------------------------------------------------------------------------------------------------------------------------------------------------------------|------------------------------------------------------|--------------------------------------------------------------------------------------------------------------------------------------------------------------------------------------------------------------------|-----------------------------------------------------------------------------------------------------------------------------------------------------------------------------------------------------------------------------------------------------------------------|---------------------------------------------------------------------------------------------------------------------------------------------------------------------------------------------------------------------------------------------------------------------------------------------------------------------------------------------------------------------------------------------------------------------------------------------------------------------------------------------|
| <b>Ketchum et al, 2020</b><br>US<br>2016–2017 | 127 adults hospitalised with AHRF ( $\text{PaO}_2/\text{FiO}_2 \leq 300$ ) and ARDS, and receiving invasive MV for >12 hours, who died during hospitalization<br>ARDS risk factors present:<br><ul style="list-style-type: none"> <li>• Shock (non-cardiogenic): 78%</li> <li>• Transfusion: 46%</li> <li>• Sepsis (non-pulmonary): 43%</li> <li>• Pneumonia: 52%</li> <li>• Aspiration: 22%</li> <li>• Other*: 51%</li> <li>• None: 2%</li> </ul> <i>*Included major trauma (9%), major surgery (7%), pulmonary contusion (3%), pancreatitis (2%), major burn (1%), inhalation injury (1%), vasculitis (&lt;1%).</i> | Median age 62 years (IQR, 51–71)<br>43% female       | Single tertiary centre<br><u>ICU setting</u> <ul style="list-style-type: none"> <li>• Medical: 72%</li> <li>• Cardiac: 3%</li> <li>• Surgical: 18%</li> <li>• Trauma/burn: 6%</li> <li>• Neurologic: 1%</li> </ul> | Berlin                                                                                                                                                                                                                                                                | Primary cause of death (organ system that most directly contributed to death or withdrawal of life support; assessed in the 72 hours before death); N=127 deaths <ul style="list-style-type: none"> <li>• Sepsis: 29%</li> <li>• Pulmonary: 28%</li> <li>• Neurologic: 17%</li> <li>• Cardiac: 10%</li> <li>• Hepatic: 6%</li> <li>• Gastrointestinal: 4%</li> <li>• Haemorrhage: 4%</li> <li>• Renal: 1%</li> <li>• Haematologic: 1%</li> <li>• Withdrawal of life support: 87%</li> </ul> |
| <b>Stapleton et al, 2005</b><br>US<br>1998    | 205 patients with ARDS                                                                                                                                                                                                                                                                                                                                                                                                                                                                                                                                                                                                | Median age 48 years (range 1–86 years)<br>66% female | Single centre                                                                                                                                                                                                      | $\text{PaO}_2/\text{FiO}_2$ ratio $\leq 150$ , or $\leq 200$ while receiving positive end-expiratory pressure $\geq 5\text{cm H}_2\text{O}$ ; opacities on chest radiography involving at least 50% of three or four quadrants; pulmonary capillary wedge pressure 18 | N=76 deaths <ul style="list-style-type: none"> <li>• MOF with sepsis: 30%</li> <li>• Central nervous system cause: 29%</li> <li>• Respiratory failure: 13%</li> <li>• Cardiac cause: 8%</li> <li>• Hepatic cause: 7%</li> <li>• Gastrointestinal cause: 3%</li> <li>• Haemorrhage: 4%</li> <li>• Haematologic: 1%</li> <li>• Renal cause: 5%</li> </ul>                                                                                                                                     |

| Author(s), year, country, study period                   | Patients with ARDS                                                                                                                                                                                                                                                                                                                                                                                                                                                      | Demographics                                        | Setting       | ARDS definition                                                                                                      | Causes of death                                                                                                                                                                                                                                                                                                                                                                                                                                                                                                                                                                            |
|----------------------------------------------------------|-------------------------------------------------------------------------------------------------------------------------------------------------------------------------------------------------------------------------------------------------------------------------------------------------------------------------------------------------------------------------------------------------------------------------------------------------------------------------|-----------------------------------------------------|---------------|----------------------------------------------------------------------------------------------------------------------|--------------------------------------------------------------------------------------------------------------------------------------------------------------------------------------------------------------------------------------------------------------------------------------------------------------------------------------------------------------------------------------------------------------------------------------------------------------------------------------------------------------------------------------------------------------------------------------------|
|                                                          |                                                                                                                                                                                                                                                                                                                                                                                                                                                                         |                                                     |               | mmHg or no other clinical evidence of left atrial hypertension; and no other obvious explanation for these findings. |                                                                                                                                                                                                                                                                                                                                                                                                                                                                                                                                                                                            |
| <b>Maamar et al, 2023</b><br>France<br>Oct 2009–Feb 2022 | 106 patients with influenza-ARDS                                                                                                                                                                                                                                                                                                                                                                                                                                        | Median age 59.0 years (IQR,49.0–65.7)<br>39% female | Single ICU    | Berlin                                                                                                               | N=32 deaths <ul style="list-style-type: none"> <li>• Primary infection-related MOF: 57%</li> <li>• Refractory hypoxemia: 17%</li> <li>• Mesenteric ischemia: 7%</li> <li>• Central nervous system disorder: 10%</li> <li>• End-of-life decision: 10%</li> </ul>                                                                                                                                                                                                                                                                                                                            |
| <b>Wu et al, 2017</b><br>Taiwan<br>2007–2016             | 106 non-trauma patients who received vvECMO for ARDS<br>Causes of ARDS were categorised into 4 groups: <ul style="list-style-type: none"> <li>• Bacterial pneumonia: 37% (n=41; three were fungal pneumonia, and the top three found bacteria were <i>Staphylococcus aureus</i>, <i>Pseudomonas aeruginosa</i>, and <i>Acinetobacter baumannii</i>)</li> <li>• Viral pneumonia: 21% (n=24; all influenza type A)</li> <li>• Aspiration pneumonitis: 3% (n=3)</li> </ul> | Mean age 53 years (SD±15) years<br>33% female       | Single centre | Not reported                                                                                                         | N=56 deaths (35 while on ECMO) <ul style="list-style-type: none"> <li>• Death while on vv-ECMO due to haemorrhagic complications (11%, n=6); included intracranial hemorrhages (n=2), intra-abdominal or retroperitoneal hemorrhages (n=1), and gastrointestinal tract hemorrhages (n=4)</li> <li>• MOF syndrome with sepsis (89%; n=50)</li> </ul> Among the 56 deaths: <ul style="list-style-type: none"> <li>• 39% had bacterial pneumonia has cause of ARDS</li> <li>• 23% had viral pneumonia has cause of ARDS</li> <li>• 0% had aspiration pneumonitis has cause of ARDS</li> </ul> |

| Author(s), year, country, study period                            | Patients with ARDS                                                                                                                                                                                                                                                                                                                                                                                                      | Demographics                                     | Setting                                | ARDS definition                                                                                                                                                                                      | Causes of death                                                                                                                                                                                                                                                                                                                               |
|-------------------------------------------------------------------|-------------------------------------------------------------------------------------------------------------------------------------------------------------------------------------------------------------------------------------------------------------------------------------------------------------------------------------------------------------------------------------------------------------------------|--------------------------------------------------|----------------------------------------|------------------------------------------------------------------------------------------------------------------------------------------------------------------------------------------------------|-----------------------------------------------------------------------------------------------------------------------------------------------------------------------------------------------------------------------------------------------------------------------------------------------------------------------------------------------|
|                                                                   | <ul style="list-style-type: none"> <li>Others: 3% (n=38); included pneumonia without identifiable pathogens (n=24); pulmonary hemorrhage caused by autoimmune vasculitis (n=2); pneumonia after near-drowning (n=1); and pulmonary edema due to acute on chronic renal failure (n=4), acute pancreatitis (n=3), or after percutaneous interventions (n=4; 3 for cardiac lesions and 1 for cerebral aneurysm)</li> </ul> |                                                  |                                        |                                                                                                                                                                                                      | <ul style="list-style-type: none"> <li>32% had 'other' acute respiratory diagnoses</li> </ul>                                                                                                                                                                                                                                                 |
| <b>Riviello <i>et al</i>, 2016</b><br>Rwanda<br>Feb 2014–Apr 2014 | 42 patients (age >15 years) with ARDS<br>Cause of ARDS: <ul style="list-style-type: none"> <li>Infection: 44% (majority being pulmonary)</li> <li>Trauma: 29%</li> <li>Surgery: 25%</li> </ul>                                                                                                                                                                                                                          | Median age 37 years (IQR, 26–49)<br>46% female   | Single centre                          | Berlin (modified; without a requirement for PEEP, hypoxia cutoff defined by $SpO_2/FIO_2 \leq 315$ , and use of either lung ultrasound or chest radiograph for determination of bilateral opacities) | N=38 deaths <ul style="list-style-type: none"> <li>Trauma: 32% (n=12)</li> <li>Infectious diseases: 18% (n=7)</li> <li>Gastrointestinal system: 16% (n=6)</li> <li>Respiratory system: 11% (n=4)</li> <li>Neoplasms: 8% (n=3)</li> <li>Cardiovascular: 5% (n=2)</li> <li>Pregnancy/peripartum: 5% (n=2)</li> <li>Unknown: 5% (n=2)</li> </ul> |
| <b>Al-Thani <i>et al</i>, 2022</b><br>Qatar<br>Jan 2014– Jan 2020 | 85 patients with trauma who developed ARDS<br>Cause of ARDS=trauma                                                                                                                                                                                                                                                                                                                                                      | Mean age 34.3 years (SD±14.9) years<br>8% female | Level I trauma facility, single centre | Berlin                                                                                                                                                                                               | <b>N=35 deaths</b> <ul style="list-style-type: none"> <li>Head injury: 57.1%</li> <li>MOF: 25.7%</li> <li>Septic shock: 14.3%</li> <li>Cardiac arrest: 2.9%</li> </ul>                                                                                                                                                                        |

| Author(s), year, country, study period                            | Patients with ARDS                                                                                                                                                                          | Demographics                              | Setting                  | ARDS definition | Causes of death                                                                                                                                                                                                                             |
|-------------------------------------------------------------------|---------------------------------------------------------------------------------------------------------------------------------------------------------------------------------------------|-------------------------------------------|--------------------------|-----------------|---------------------------------------------------------------------------------------------------------------------------------------------------------------------------------------------------------------------------------------------|
| <b>Gerard <i>et al</i>, 2018</b><br>Belgium<br>Jan 2007– Jan 2017 | 51 patients with an ICD-9 code 518.82 ‘clinical modification suggesting ARDS’ in the discharge diagnosis notes, along with a procedure code for Open Lung Biopsy or Exploratory thoracotomy | Median age 66.9 (IQR 52–76)<br>45% female | Mixed ICU; single centre | Berlin          | <b>N=30 deaths</b> <ul style="list-style-type: none"> <li>• Shock/MOF: 40%</li> <li>• Refractory hypoxemia: 17%</li> <li>• Refractory respiratory acidosis: 20%</li> <li>• Withdrawal of life support: 13%</li> <li>• Other: 10%</li> </ul> |

AECC, American-European Consensus Criteria; AHRF, acute hypoxemic respiratory failure; ARDS, acute respiratory distress syndrome; FiO<sub>2</sub>, fraction of inspired oxygen; ICU, intensive care unit; IQR, interquartile range; ICD, International Classification of Diseases; MOF, multiple organ failure; MV, mechanical ventilation; PaO<sub>2</sub>, partial pressure of oxygen; PEEP, positive end-expiratory pressure; SD, standard deviation; SpO<sub>2</sub>, oxygen saturation; vvECMO, venovenous extra corporeal membrane oxygenation

**eTable 4.** Details on individual observational studies reporting on causes of death among patients with COVID ARDS) (n=6).

| Author(s), year, country, study period                           | Patients with ARDS                                                                               | Demographics                                   | Setting              | ARDS definition | Causes of death                                                                                                                                                                                                                                                                                                                                                                                                                                                                                                                                                                                                                                                                                                                                                                                                                                                                                                                                                                                                                                                                                                                                                                                                                                                                                                                                                                |
|------------------------------------------------------------------|--------------------------------------------------------------------------------------------------|------------------------------------------------|----------------------|-----------------|--------------------------------------------------------------------------------------------------------------------------------------------------------------------------------------------------------------------------------------------------------------------------------------------------------------------------------------------------------------------------------------------------------------------------------------------------------------------------------------------------------------------------------------------------------------------------------------------------------------------------------------------------------------------------------------------------------------------------------------------------------------------------------------------------------------------------------------------------------------------------------------------------------------------------------------------------------------------------------------------------------------------------------------------------------------------------------------------------------------------------------------------------------------------------------------------------------------------------------------------------------------------------------------------------------------------------------------------------------------------------------|
| Estenssoro <i>et al</i> , 2021<br>Argentina<br>Mar 2020–Oct 2020 | 1909 patients with COVID-19 receiving invasive MV<br><br>ARDS developed in 1672 (87.6%) patients | Median age 62 years (IQR, 52–70)<br>32% female | Multicentre; 63 ICUs | Berlin          | <p><b>Primary cause of death (N=1079)</b></p> <ul style="list-style-type: none"> <li>• Refractory hypoxaemia: 43% (n=462; among these 174 had septic shock identified as secondary cause of death; and 139 had multiple organ dysfunction syndrome identified as tertiary cause of death)</li> <li>• Septic shock: 31% (n=337)</li> <li>• Multiple organ dysfunction syndrome: 18% (n=190)</li> <li>• Acute myocardial infarction: 1% (n=16)</li> <li>• Acute heart failure: 1% (n=12)</li> <li>• Stroke: 1% (n=8)</li> <li>• Do-not-resuscitate: 1% (n=6)</li> <li>• Pulmonary thromboembolism: 0% (n=1)</li> <li>• Other: 4% (n=48)</li> </ul> <p><b>Secondary concomitant cause of death (N=486)</b></p> <ul style="list-style-type: none"> <li>• Septic shock: 36% (n=175)</li> <li>• Multiple organ dysfunction syndrome: 47% (n=229)</li> <li>• Acute myocardial infarction: 1% (n=4)</li> <li>• Acute heart failure: 2% (n=8)</li> <li>• Stroke: 1% (n=6)</li> <li>• Do-not-resuscitate: 8% (n=37)</li> <li>• Other: 5% (n=26)</li> </ul> <p><b>Tertiary concomitant cause of death (N=486)</b></p> <ul style="list-style-type: none"> <li>• Multiple organ dysfunction syndrome: 68% (n=80)</li> <li>• Acute myocardial infarction: 1% (n=1)</li> <li>• Acute heart failure: 1% (n=1)</li> <li>• Do-not-resuscitate: 17% (n=20)</li> <li>• Other: 9% (n=10)</li> </ul> |

| Author(s), year, country, study period                                   | Patients with ARDS                                            | Demographics                                        | Setting                                            | ARDS definition | Causes of death                                                                                                                                                                                                                                                                                                                                                                                                                                                                                                                                                                                          |
|--------------------------------------------------------------------------|---------------------------------------------------------------|-----------------------------------------------------|----------------------------------------------------|-----------------|----------------------------------------------------------------------------------------------------------------------------------------------------------------------------------------------------------------------------------------------------------------------------------------------------------------------------------------------------------------------------------------------------------------------------------------------------------------------------------------------------------------------------------------------------------------------------------------------------------|
| <b>Estenssoro <i>et al</i>, 2022</b><br>Argentina<br>Mar 2020–Oct 2020   | 1525 patients with COVID-19 ARDS receiving invasive MV        | Mean age 61 years ( $\pm 13$ )<br>31% female        | Multicentre; 63 ICUs                               | Berlin          | <b>N=894 deaths</b><br>Refractory hypoxaemia was the main cause of death: 47% (n=420)                                                                                                                                                                                                                                                                                                                                                                                                                                                                                                                    |
| <b>Maamar <i>et al</i>, 2023</b><br>France<br>Oct 2009–Feb 2022          | 244 patients with COVID-19 ARDS                               | Median age 63.5 years (IQR, 54.0–71.2)<br>33 female | Single ICU                                         | Berlin          | N=37 deaths<br><ul style="list-style-type: none"> <li>• Primary infection-related MOF: 23%</li> <li>• Refractory hypoxemia: 50%</li> <li>• Mesenteric ischemia: 10%</li> <li>• Central nervous system disorder: 7%</li> <li>• End-of-life decision: 7%</li> </ul>                                                                                                                                                                                                                                                                                                                                        |
| <b>Raasveld <i>et al</i>, 2022</b><br>International<br>Mar 2020–Dec 2020 | 193 patients with COVID-19 ARDS receiving VV-ECMO             | Median age 53 years) IQR, 48–60)<br>22% female      | Multicentre; 15 ICUs                               | Not reported    | <b>N=67 (35% of patients)</b><br>Irreversible respiratory failure during ECMO resulting in palliation: 88% (n=59)                                                                                                                                                                                                                                                                                                                                                                                                                                                                                        |
| <b>Pestaña <i>et al</i>, 2022</b><br>Spain<br>Mar–Apr 2020               | 141 adults with COVID-19 ARDS                                 | Median age 61 years (IQR 57–67)<br>23% female       | Single centre ICU                                  | Not reported    | <b>N=52 deaths</b><br><ul style="list-style-type: none"> <li>• Refractory respiratory failure and persistent hypoxaemia (<math>\text{PaO}_2/\text{FiO}_2 &lt; 100</math>): 65% (n=34), with 85% of these (29/34) having presented during mechanical ventilation with a restrictive pattern of respiratory mechanics</li> <li>• Pulmonary embolism (diagnosed by CT scan or clinical signs of right ventricular failure by echocardiogram): 14%</li> <li>• Septic shock: 33%</li> <li>• Haemorrhage/neurological disorders: 20%</li> </ul> Some patients had a combination of $\geq 2$ of these diagnoses |
| <b>Daviet <i>et al</i>, 2021</b><br>France<br>Mar–Nov 2020               | 76 patients with severe COVID-19 ARDS and supported with ECMO | Median age 61 years (IQR, 54–65)                    | Single centre constituted of 5 different ICU units | Not reported    | <b>N=37 deaths (at 90-days)</b><br><ul style="list-style-type: none"> <li>• Septic shock: 35%</li> <li>• Haemorrhagic shock: 32%</li> <li>• Irretractable respiratory failure: 16%</li> <li>• Cardiogenic shock: 3%</li> <li>• Stroke: 5%</li> <li>• MOF: 8%</li> </ul>                                                                                                                                                                                                                                                                                                                                  |

ARDS, acute respiratory distress syndrome; CT, computed tomography; ECMO, extra corporeal membrane oxygenation; FiO<sub>2</sub>, fraction of inspired oxygen; ICU, intensive care unit; IQR, interquartile range; MOF, multiple organ failure; MV, mechanical ventilation; PaO<sub>2</sub>, partial pressure of oxygen



**eTable 5.** Categories used to record death in observational studies where this was pre-specified.

| Author(s); year; study period                     | Country, study year/ period | Patients | Deaths | Prospective/ retrospective recording of cause of death | Pre-specified categories                                                                                                                                                                                                                                                                                                                                                                               |
|---------------------------------------------------|-----------------------------|----------|--------|--------------------------------------------------------|--------------------------------------------------------------------------------------------------------------------------------------------------------------------------------------------------------------------------------------------------------------------------------------------------------------------------------------------------------------------------------------------------------|
| <b>Studies among patients with non-COVID ARDS</b> |                             |          |        |                                                        |                                                                                                                                                                                                                                                                                                                                                                                                        |
| Laffey et al 2017 <sup>16</sup>                   | International<br>2014       | 2813     | 964    | Prospective                                            | Section completed at ICU death (death form)<br>If patient did not survive:<br>What was the most important factor leading to ICU Death (Check one) <ul style="list-style-type: none"> <li>• respiratory failure</li> <li>• cardiovascular failure (i.e. Unresponsive shock)</li> <li>• renal failure</li> <li>• hepatic failure</li> <li>• coagulation failure</li> <li>• neurologic failure</li> </ul> |
| Villar et al, 2018 <sup>13</sup>                  | Spain<br>NR                 | 778      | 302    | Prospective                                            | Physicians instructed to report the primary cause of death within the following categories: <ul style="list-style-type: none"> <li>• refractory hypoxemia due to unresolved ARDS</li> <li>• multi-system organ failure</li> <li>• irreversible shock</li> <li>• brain death</li> <li>• limitation of therapeutic efforts for end-of-life</li> <li>• Others</li> </ul>                                  |
| Gacouin et al; 2020 <sup>14</sup>                 | France<br>Oct 2009–Mar 2020 | 572      | 197    | Prospective                                            | Categorized into the following groups: <ul style="list-style-type: none"> <li>• primary infection-related MOF</li> <li>• refractory hypoxemia</li> <li>• mesenteric ischemia</li> <li>• central nervous system disorder</li> <li>• end-of-life decision</li> <li>• others</li> </ul>                                                                                                                   |
| Ketcham et al, 2020 <sup>15</sup>                 | US<br>2016–2017             | NR       | 127    | Retrospective                                          | The following tick lists were applied:<br><i>“Please choose the organ system with IRREVERSIBLE dysfunction that most directly contributed to the patient’s death”</i> <ul style="list-style-type: none"> <li>• septic shock</li> <li>• pulmonary</li> <li>• cardiac</li> <li>• central nervous system</li> </ul>                                                                                       |

| Author(s); year; study period | Country, study year/ period | Patients | Deaths | Prospective/ retrospective recording of cause of death | Pre-specified categories                                                                                                                                                                                                                                                                                                                                                                                                                                                                                                                                                                                                                                                                                                                                                                                  |
|-------------------------------|-----------------------------|----------|--------|--------------------------------------------------------|-----------------------------------------------------------------------------------------------------------------------------------------------------------------------------------------------------------------------------------------------------------------------------------------------------------------------------------------------------------------------------------------------------------------------------------------------------------------------------------------------------------------------------------------------------------------------------------------------------------------------------------------------------------------------------------------------------------------------------------------------------------------------------------------------------------|
| Maamar <i>et al</i> , 2023    | France<br>Oct 2009–Feb 2022 | 106      | 32     | Prospective                                            | <ul style="list-style-type: none"> <li>• hematologic</li> <li>• hemorrhagic</li> <li>• hepatic</li> <li>• gastrointestinal</li> </ul> <p>renal “AND, please choose the organ system with SEVERE dysfunction that most directly contributed to the patient’s death”</p> <ul style="list-style-type: none"> <li>• septic shock</li> <li>• pulmonary</li> <li>• cardiac</li> <li>• central nervous system</li> <li>• hematologic</li> <li>• hemorrhagic</li> <li>• hepatic</li> <li>• gastrointestinal</li> <li>• renal</li> </ul> <p>Categorized into the following groups:</p> <ul style="list-style-type: none"> <li>• primary infection-related MOF</li> <li>• refractory hypoxemia</li> <li>• mesenteric ischemia</li> <li>• central nervous system disorder</li> <li>• end-of-life decision</li> </ul> |
| Stapleton <i>et al</i> , 2005 | US<br>1998                  | 205      | 30     | Prospective                                            | <p>Three of the authors (investigators) reviewed patients medical charts. A death was categorized as due to the presenting injury/illness or progression of the ARDS risk factor if it was associated with conditions that preceded ARDS onset.</p> <p>Rigorous inspection of temporal relationships of laboratory data, hemodynamic and respiratory parameters, and nursing and physician notes was used to identify one of nine causes of death:</p> <ul style="list-style-type: none"> <li>• MOF with sepsis</li> <li>• respiratory</li> <li>• cardiac,</li> <li>• central nervous system</li> <li>• hematologic</li> </ul>                                                                                                                                                                            |

| Author(s); year; study period                         | Country, study year/ period    | Patients | Deaths | Prospective/ retrospective recording of cause of death | Pre-specified categories                                                                                                                                                                                                                                                                                                                                                                                                                                                                       |
|-------------------------------------------------------|--------------------------------|----------|--------|--------------------------------------------------------|------------------------------------------------------------------------------------------------------------------------------------------------------------------------------------------------------------------------------------------------------------------------------------------------------------------------------------------------------------------------------------------------------------------------------------------------------------------------------------------------|
|                                                       |                                |          |        |                                                        | <ul style="list-style-type: none"> <li>• hemorrhage</li> <li>• hepatic</li> <li>• gastrointestinal</li> <li>• renal</li> </ul>                                                                                                                                                                                                                                                                                                                                                                 |
| <b>Studies among patients with covid-related ARDS</b> |                                |          |        |                                                        |                                                                                                                                                                                                                                                                                                                                                                                                                                                                                                |
| Estenssoro <i>et al</i> , 2021                        | Argentina<br>Mar 2020–Oct 2020 | 1909     | 1079   | Prospective                                            | <p>Causes of death were selected from a list of nine predetermined possibilities:</p> <ul style="list-style-type: none"> <li>• refractory hypoxemia</li> <li>• septic shock</li> <li>• multiple organ dysfunction syndrome</li> <li>• acute myocardial infarction</li> <li>• acute heart failure</li> <li>• stroke</li> <li>• do-not resuscitate order</li> <li>• pulmonary thromboembolism</li> <li>• other</li> </ul> <p>Note: “<i>more than one cause of death could be considered</i>”</p> |
| Estenssoro <i>et al</i> , 2022                        | Argentina<br>Mar 2020–Oct 2020 | 1525     | 894    | Prospective                                            | <p>Causes of death were selected from a list of nine predetermined possibilities:</p> <ul style="list-style-type: none"> <li>- refractory hypoxemia</li> <li>- septic shock</li> <li>- multiple organ dysfunction syndrome</li> <li>- acute myocardial infarction</li> <li>- acute heart failure</li> <li>- stroke</li> <li>- do-not resuscitate order</li> <li>- pulmonary thromboembolism</li> <li>- other</li> </ul> <p>Note: “<i>more than one cause of death could be considered</i>”</p> |
| Pestaña <i>et al</i> , 2022                           | Spain                          | 141      | 52     | Retrospective                                          | <p>Four clinical diagnoses were defined to assess the causes of death:</p> <ul style="list-style-type: none"> <li>• refractory respiratory failure</li> </ul>                                                                                                                                                                                                                                                                                                                                  |

| Author(s); year; study period | Country, study year/ period                     | Patients | Deaths | Prospective/ retrospective recording of cause of death | Pre-specified categories                                                                                                                                                                                                                                                                                                                                                                                                                                                                                          |
|-------------------------------|-------------------------------------------------|----------|--------|--------------------------------------------------------|-------------------------------------------------------------------------------------------------------------------------------------------------------------------------------------------------------------------------------------------------------------------------------------------------------------------------------------------------------------------------------------------------------------------------------------------------------------------------------------------------------------------|
| Maamar <i>et al</i> , 2023    | France<br>Mar–Apr 2020<br><br>Oct 2009–Feb 2022 | 244      | 37     | Prospective                                            | <ul style="list-style-type: none"> <li>• pulmonary embolism (diagnosed by CT scan or clinical signs of right ventricular failure by echocardiography)</li> <li>• septic shock</li> <li>• other (hemorrhage, neurological disorders)</li> </ul> Categorized into the following groups: <ul style="list-style-type: none"> <li>• primary infection-related MOF</li> <li>• refractory hypoxemia</li> <li>• mesenteric ischemia</li> <li>• central nervous system disorder</li> <li>• end-of-life decision</li> </ul> |

CT, computed tomography; MOF, multiple organ failure; US, United States

**eTable 6.** Reported cause of death in clinical trials of patients with ARDS (all were non-COVID-related ARDS, n=5).

| Author(s), year, country, study period                           | Patients with ARDS                                                                                                                                                                                                                     | Setting                                  | ARDS definition | Recording of death | Reported causes of death                                                                                                                                                                                                                                                                                                                                                                                                                                                                                                                                                                                                                                              |
|------------------------------------------------------------------|----------------------------------------------------------------------------------------------------------------------------------------------------------------------------------------------------------------------------------------|------------------------------------------|-----------------|--------------------|-----------------------------------------------------------------------------------------------------------------------------------------------------------------------------------------------------------------------------------------------------------------------------------------------------------------------------------------------------------------------------------------------------------------------------------------------------------------------------------------------------------------------------------------------------------------------------------------------------------------------------------------------------------------------|
| <b>Constantin et al, 2019</b><br>France<br>Jun 2014–<br>Feb 2017 | 420 patients with moderate-severe ARDS randomized to personalized MV strategy or control (non-personalized standard of care)<br>196 patients in the personalized arm and 204 patients in the control arm were included in the analysis | Multicentre<br>(20 ICUs)                 | Berlin          | Not specified      | <p><b>All ARDS deaths (N=107)</b></p> <ul style="list-style-type: none"> <li>• Death directly related to ARDS: 34% (n=36)</li> <li>• Related to underlying disease: 64% (n=68)</li> <li>• Unknown: 3% (n=3)</li> </ul> <p><b>Focal ARDS (26 deaths)</b></p> <ul style="list-style-type: none"> <li>• Death directly related to ARDS: 35% (n=9)</li> <li>• Related to underlying disease: 62% (n=16)</li> <li>• Unknown: 4% (n=1)</li> </ul> <p><b>Non-focal ARDS (81 deaths)</b></p> <ul style="list-style-type: none"> <li>• Death directly related to ARDS: 33% (n=27)</li> <li>• Related to underlying disease: 64% (n=52)</li> <li>• Unknown: 2% (n=2)</li> </ul> |
| <b>Villar et al, 2020</b><br>Spain<br>Mar 2013–<br>Dec 2018      | 277 patients with moderate-to-severe ARDS receiving MV and randomized to i.v. dexamethasone plus conventional treatment (n=139) or control (continued routine intensive care=138)                                                      | Multicentre<br>(17 ICUs<br>across Spain) | AECC/<br>Berlin | Not specified      | <p><b>ICU deaths (N=69)</b></p> <ul style="list-style-type: none"> <li>• MOF: 51% (n=35)</li> <li>• Irreversible shock: 16% (n=11)</li> <li>• Refractory hypoxemia: 16% (n=11)</li> <li>• Brain death: 6% (n=4)</li> <li>• Limitation of therapeutic efforts: 7% (n=5)</li> <li>• Others: 4% (n=3)</li> </ul>                                                                                                                                                                                                                                                                                                                                                         |
| <b>Mahmoud et al, 2020</b><br>Egypt<br>Mar 2016–<br>Jan 2018     | 60 patients aged 21–60 years with severe ARDS nonresponsive to recruitment maneuver, prone position and neuromuscular block, randomized to nebulized heparin (n=20), nebulized streptokinase (n=20) or conservative management (n=20)  | Single centre                            | Berlin          | Not specified      | <p><b>Deaths (N=39)</b></p> <p><b>Death in heparin group (N=14 deaths)</b><br/>“Mortalities were due to MOF secondary to sepsis”</p> <p><b>Deaths in streptokinase group (N=7)</b></p> <ul style="list-style-type: none"> <li>• MOF due to sepsis (n=5)</li> <li>• Acute massive MI (n=1)</li> <li>• massive bilateral pulmonary embolism (n=1)</li> </ul> <p><b>Deaths in control group (N=18)</b><br/>No details reported</p>                                                                                                                                                                                                                                       |

| Author(s), year, country, study period                             | Patients with ARDS                                                                                                                                                                                                                                                                                                                                                                       | Setting                  | ARDS definition | Recording of death | Reported causes of death                                                                                                                                                                                                                                                                                                                                                                                                                                                                                                                                                                                                                                                                                                                                  |
|--------------------------------------------------------------------|------------------------------------------------------------------------------------------------------------------------------------------------------------------------------------------------------------------------------------------------------------------------------------------------------------------------------------------------------------------------------------------|--------------------------|-----------------|--------------------|-----------------------------------------------------------------------------------------------------------------------------------------------------------------------------------------------------------------------------------------------------------------------------------------------------------------------------------------------------------------------------------------------------------------------------------------------------------------------------------------------------------------------------------------------------------------------------------------------------------------------------------------------------------------------------------------------------------------------------------------------------------|
| <b>Bellingan et al, 2022</b><br>UK and US<br>Mar 2016–<br>Sep 2018 | 36 patients with moderate-to-severe ARDS randomized to multipotent adult progenitor cells (n=26; 3 subcohorts of n=3, n=3 and n=20) or placebo (n=10)<br><b>Cause of ARDS</b> <ul style="list-style-type: none"> <li>• Pneumonia: 56% (n=20)</li> <li>• Pneumonia/sepsis: 19% (n=7)</li> <li>• Sepsis: 11% (n=4)</li> <li>• Aspiration: 8% (n=3)</li> <li>• Other: n=6% (n=2)</li> </ul> | Multicentre (12 centres) | Berlin          | Not specified      | <b>Deaths (N=14)</b><br>Reported causes of death included respiratory and multiple organ failure, sepsis, pneumonia, aspiration, pulmonary hemorrhage, and intestinal ischemia                                                                                                                                                                                                                                                                                                                                                                                                                                                                                                                                                                            |
| <b>McAuley et al, 2017</b><br>UK<br>Feb 2011–<br>Feb 2014          | 60 patients with ARDS receiving MV randomized to receive keratinocyte growth factor (n=29) or placebo (n=31)                                                                                                                                                                                                                                                                             | Muticentre (two ICUs)    | AECC            | Not specified      | <b>Deaths (N=12)</b> <ul style="list-style-type: none"> <li>• Sepsis and MOF: 17% (n=2)</li> <li>• MOF (n=1)</li> <li>• Obstructive hydrocephalus and sepsis (n=1)</li> <li>• Hypoxic brain injury (n=1)</li> <li>• Cerebral hematoma (n=1)</li> <li>• Myocardial infarction and ruptured aortic aneurysm and metastatic pancreatic cancer diagnosed during ICU admission (n=1)</li> <li>• Systemic fungal infection (n=1)</li> <li>• Chronic obstructive pulmonary disorder and hypercapnic respiratory failure (n=1)</li> <li>• Chronic obstructive pulmonary disorder and hypercapnic respiratory failure (n=1)</li> <li>• Ruptured aortic aneurysm with MOF (n=1)</li> <li>• MOF and pulmonary hemorrhage and pneumocystis pneumonia (n=1)</li> </ul> |

AECC, American-European Consensus Conference; ARDS, acute respiratory distress syndrome; ECMO, extra corporeal membrane oxygenation; ICU, intensive care unit; IQR, interquartile range; i.v. intravenous; MI, myocardial infarction; MOF, multiple organ failure; MV, mechanical ventilation; RCT, randomized controlled trial; SD, standard deviation

**eTable 7.** Reported cause of death in patients with COVID-ARDS (observational studies, n=6).

| Reported cause of death                                                     |                   |                 |                          |                         |                                     |                      |                                   |                                               |              |                    |           |                     |           |                   |                   |                                         |                          |
|-----------------------------------------------------------------------------|-------------------|-----------------|--------------------------|-------------------------|-------------------------------------|----------------------|-----------------------------------|-----------------------------------------------|--------------|--------------------|-----------|---------------------|-----------|-------------------|-------------------|-----------------------------------------|--------------------------|
| Author(s); year; study period                                               | Deaths / patients | Data collection | Pre-specified categories | MOF                     | Multiple organ dysfunction syndrome | Refractory hypoxemia | Irreversible respiratory failure* | Refractory respiratory failure and persistent | Septic shock | Pulmonary embolism | Acute MI  | Acute heart failure | Stroke    | Cardiogenic shock | Hemorrhagic shock | Do not resuscitate/end of life decision | Other <sup>†</sup>       |
| <b>Estenssoro et al, 2021</b> <sup>‡</sup> ; Argentina; Mar 2020– Oct 2020* | 1079 / 1909       | Prospective     | ✓                        | NC                      | <b>18%</b>                          | <b>43%</b>           | NC                                | NC                                            | <b>31%</b>   | <b>&lt;1%</b>      | <b>1%</b> | <b>1%</b>           | <b>1%</b> | NC                | NC                | <b>1%</b>                               | <b>4%</b>                |
| <b>Estenssoro et al, 2022</b> ; Argentina; Mar 2020– Oct 2020               | 894 / 1525        | Prospective     | ✓                        | NC                      | NC                                  | <b>47%</b>           | NC                                | NC                                            | NC           | NC                 | NC        | NC                  | NC        | NC                | NC                | NC                                      | NC                       |
| <b>Maamar et al, 2023</b> ; France; Oct 2009– Dec 2022                      | 37/ 244           | Prospective     | ✓                        | <b>23%</b> <sup>§</sup> | NC                                  | <b>50%</b>           | NC                                | NC                                            | NC           | NC                 | NC        | NC                  | NC        | NC                | NC                | <b>7%</b>                               | <b>17%</b> <sup>  </sup> |

| Reported cause of death                                              |                   |                 |                          |           |                                     |                      |                                   |                                                 |              |                    |          |                     |           |                   |                   |                                         |            |
|----------------------------------------------------------------------|-------------------|-----------------|--------------------------|-----------|-------------------------------------|----------------------|-----------------------------------|-------------------------------------------------|--------------|--------------------|----------|---------------------|-----------|-------------------|-------------------|-----------------------------------------|------------|
| Author(s); year; study period                                        | Deaths / patients | Data collection | Pre-specified categories | MOF       | Multiple organ dysfunction syndrome | Refractory hypoxemia | Irreversible respiratory failure* | Refractory respiratory failure and persistent † | Septic shock | Pulmonary embolism | Acute MI | Acute heart failure | Stroke    | Cardiogenic shock | Hemorrhagic shock | Do not resuscitate/end of life decision | Other ‡    |
| <b>Raasveld <i>et al</i>, 2022;</b> International; Mar 2020–Dec 2020 | 67 / 193          | Retrospective   | ✗                        | NR        | NR                                  | NR                   | <b>88%</b>                        | NR                                              | NR           | NR                 | NR       | NR                  | NR        | NR                | NR                | NR                                      | NR         |
| <b>Pestaña <i>et al</i>, 2022;</b> Spain; Mar–Apr 2020               | 52/141            | Retrospective   | ✓                        | NC        | NC                                  | NC                   | NC                                | <b>65%</b>                                      | <b>33%</b>   | <b>14%</b>         | NC       | NC                  | NC        | NC                | NC                | NC                                      | <b>20%</b> |
| <b>Daviet <i>et al</i>, 2021;</b> France; Mar–Nov 2020               | 37/76             | Ambispective    | ✗                        | <b>8%</b> | NR                                  | NR                   | <b>16%</b>                        | NR                                              | <b>35%</b>   | NR                 | NR       | NR                  | <b>5%</b> | <b>3%</b>         | <b>32%</b>        | NR                                      | NR         |

**Note:** In Pestaña *et al*, some patients had a combination of at least two diagnoses as cause of death. \*This study also reported on secondary and tertiary concomitant cause of death (the percentages shown in the table are for the primary cause of death). †Defined as PaO<sub>2</sub>/FiO<sub>2</sub> <100. ‡Infection-related MOF. ‡10% mesenteric ischaemia, and 7% central nervous system disorder. ‡In Estenssoro *et al*, ‘other’ was not further specified. In Pestaña *et al*, ‘other’ referred to hemorrhage or neurological disorders. FiO<sub>2</sub>, fraction of inspired oxygen; MI, myocardial infarction; MOF, multiple organ failure; NC, not considered (i.e. not a category in studies that had pre-specified categories); NR, not reported; PaO<sub>2</sub>, partial pressure of oxygen
